# Supplementary material for: A NaBiF4:Gd/Tb nanoscintillator for high-resolution X-ray imaging
Source: Royal Society of Chemistry journal article supplement (doi:10.1039/d4tc01543f), 2024-01-01
Supplement: d4tc01543f1.pdf [file d4tc01543f1.pdf]

## Supporting Information

### **NaBiF<sub>4</sub>: Gd/Tb nanoscintillator for high-Resolution X-ray imaging**

Manisha Bungla,<sup>a,b</sup> Mohit Tyagi,<sup>c</sup> Ashok K. Ganguli,<sup>b,d\*</sup> and Paras N. Prasad<sup>a\*</sup>

<sup>a</sup>Department of Chemistry and The Institute for Lasers, Photonics and Biophotonics, University at Buffalo (SUNY), 14260 Buffalo, NY, USA

<sup>b</sup>Department of Chemistry, Indian Institute of Technology Delhi, Hauz Khas, New Delhi 110016, India

<sup>c</sup>Technical Physics Division, Bhabha Atomic Research Centre, Trombay, Mumbai-400085, India

<sup>d</sup>Department of Chemical Sciences, Indian Institute of Science Education & Research, Berhampur, Laudigam, Odisha 760003, India

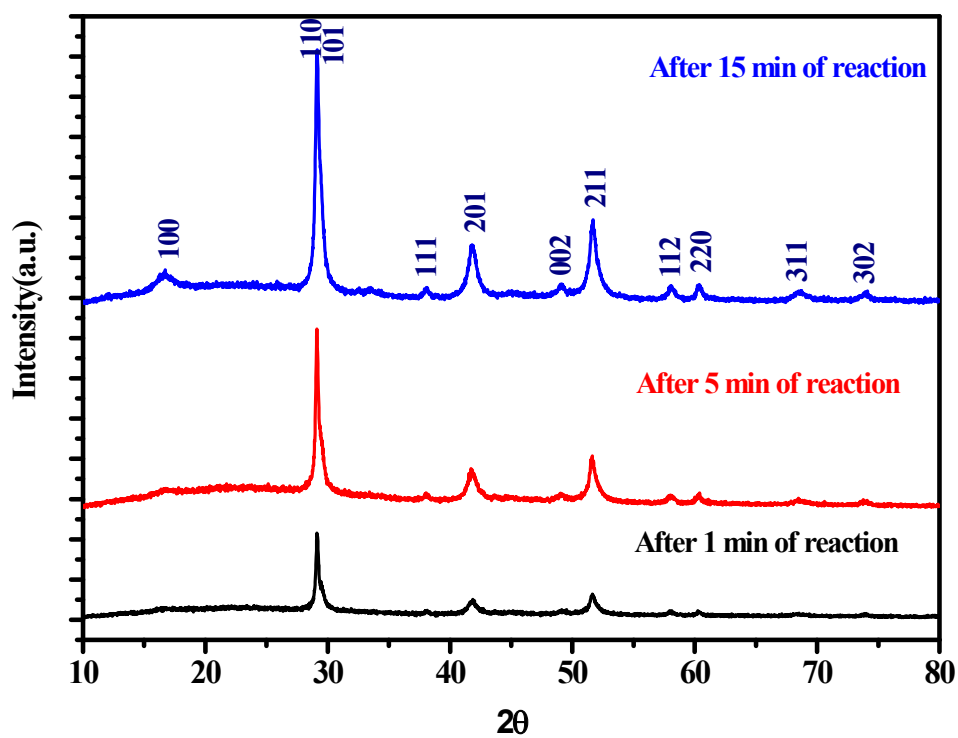

**Figure S1:** PXRD pattern showing the formation of NaBiF<sub>4</sub> immediately after 1 min, 5min and 15 min of reaction.

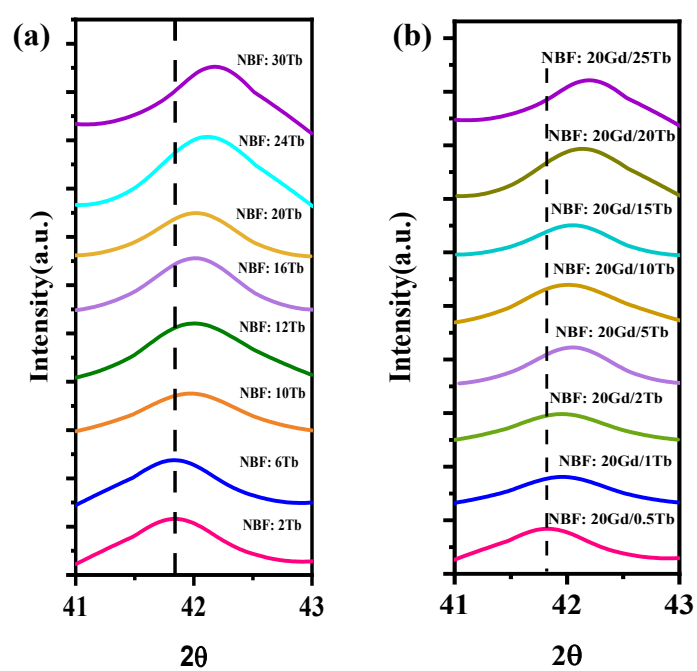

**Figure S2.** The magnified XRD patterns of the (201) peak.

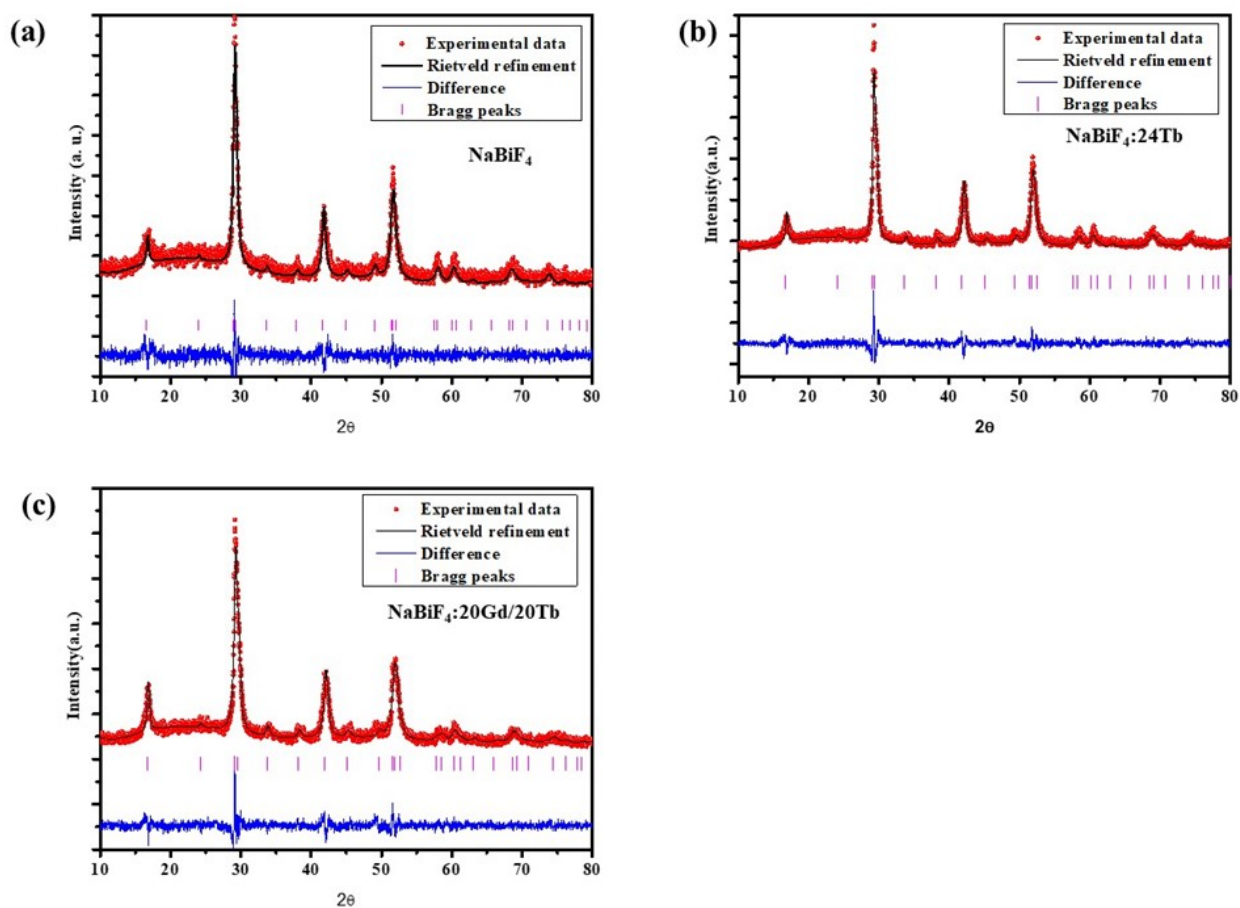

**Figure S3.** PXRD Rietveld refinement of (a)  $\text{NaBiF}_4$ , (b)  $\text{NaBiF}_4:24\text{Tb}$  and (c)  $\text{NaBiF}_4:20\text{Gd}/20\text{Tb}$  nanoparticles.

**Table S1.** Refined positional parameters for hexagonal NaBiF<sub>4</sub> nanoparticles after the final cycle of refinement.

|                      | <b>NaBiF<sub>4</sub></b> | <b>NaBiF<sub>4</sub>:24Tb</b> | <b>NaBiF<sub>4</sub>:20Gd/20Tb</b> |
|----------------------|--------------------------|-------------------------------|------------------------------------|
| Crystal Structure    | Hexagonal                |                               |                                    |
| Space Group          | $P\bar{6}$               |                               |                                    |
| a(Å)                 | 6.1556(16)               | 6.1428(11)                    | 6.1330(13)                         |
| c(Å)                 | 3.7195(12)               | 3.69079(83)                   | 3.6749(11)                         |
| R <sub>exp</sub> (%) | 10.77                    | 10.02                         | 8.77                               |
| R <sub>p</sub> (%)   | 9.47                     | 9.47                          | 8.51                               |
| R <sub>wp</sub>      | 12.01                    | 11.91                         | 10.78                              |
| GOF(S)               | 1.12                     | 1.19                          | 1.23                               |

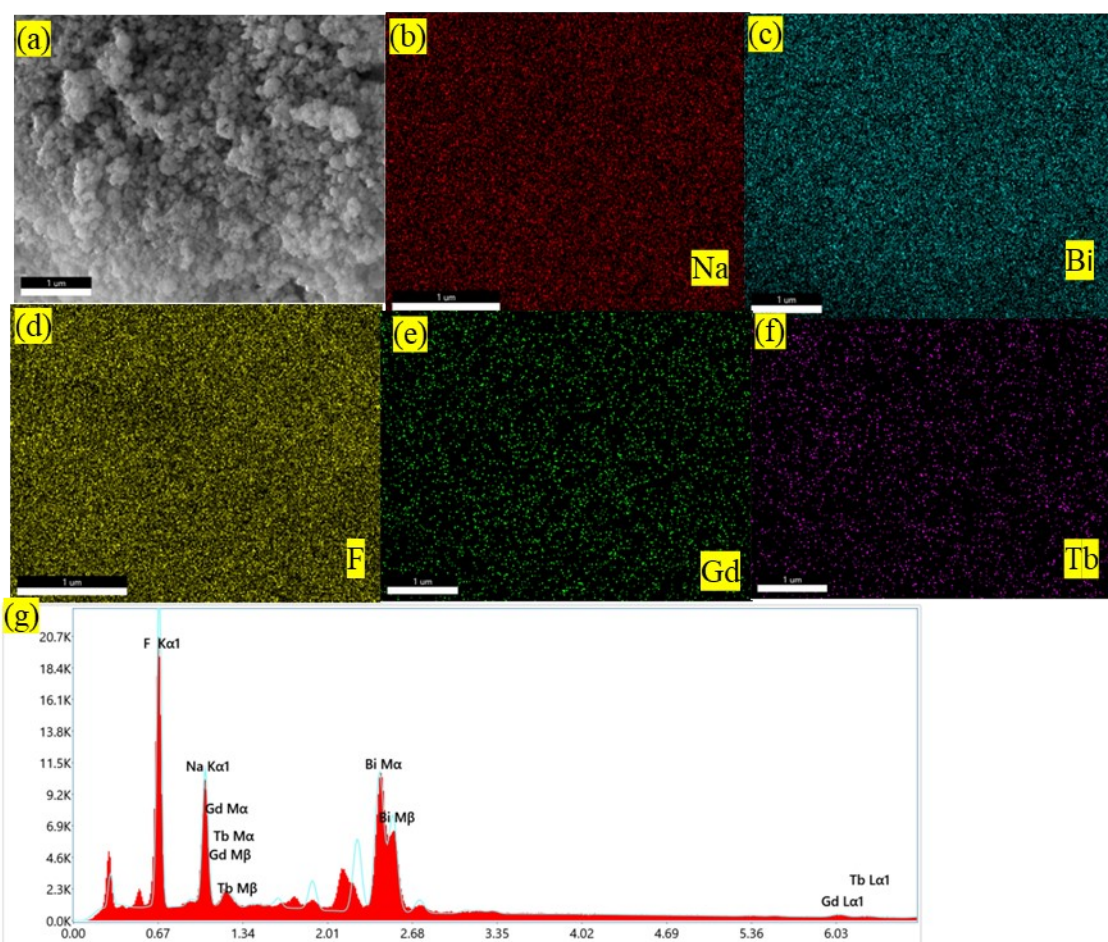

**Figure S4.** Elemental mapping results (a-f) of NaBiF<sub>4</sub>: 20Gd/20Tb NPs (g) EDX spectrum

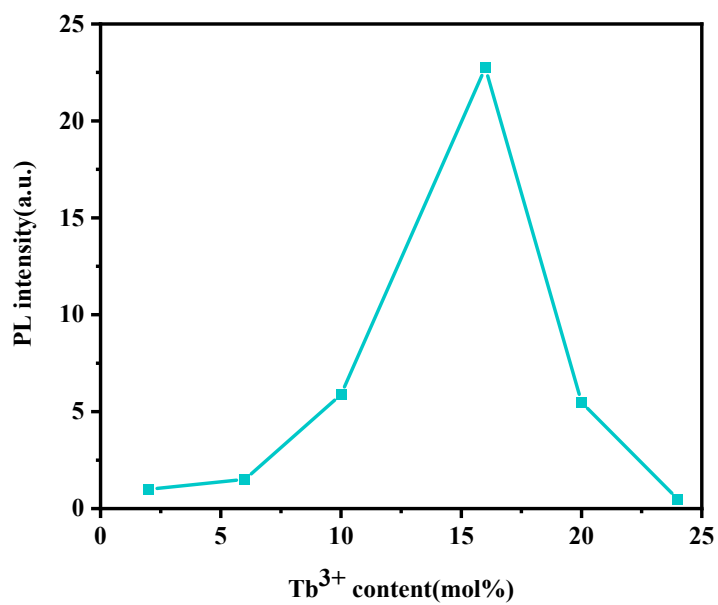

**Figure S5.** Integrated PL intensity profiles at various Tb<sup>3+</sup> doping contents.

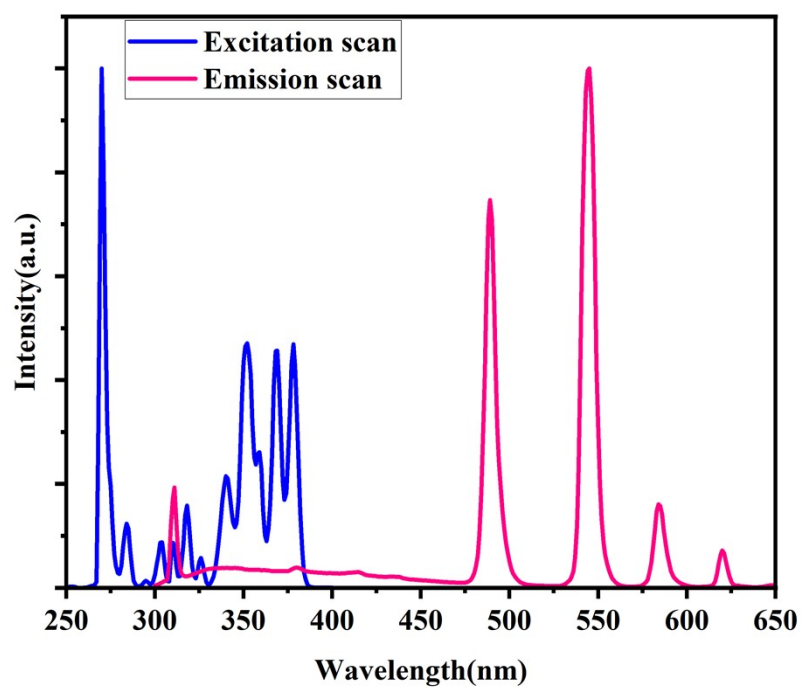

**Figure S6.** PLE and PL spectra of NBF: Gd, Tb nanoparticles.

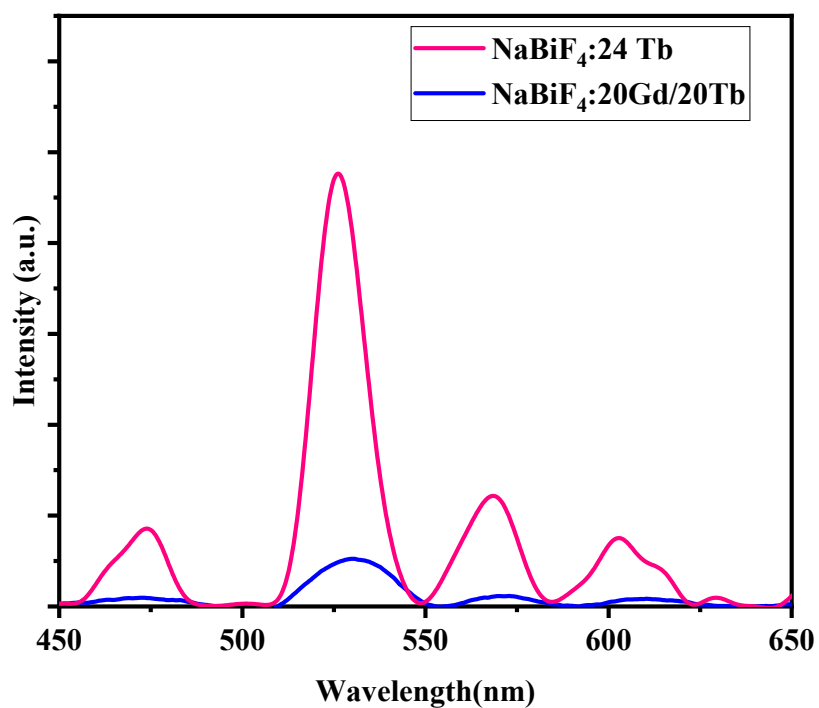

**Figure S7.** Afterglow spectra of the NaBiF<sub>4</sub>:20Gd/20Tb and NaBiF<sub>4</sub>:24Tb NPs recorded after cessation of X-ray irradiation immediately.

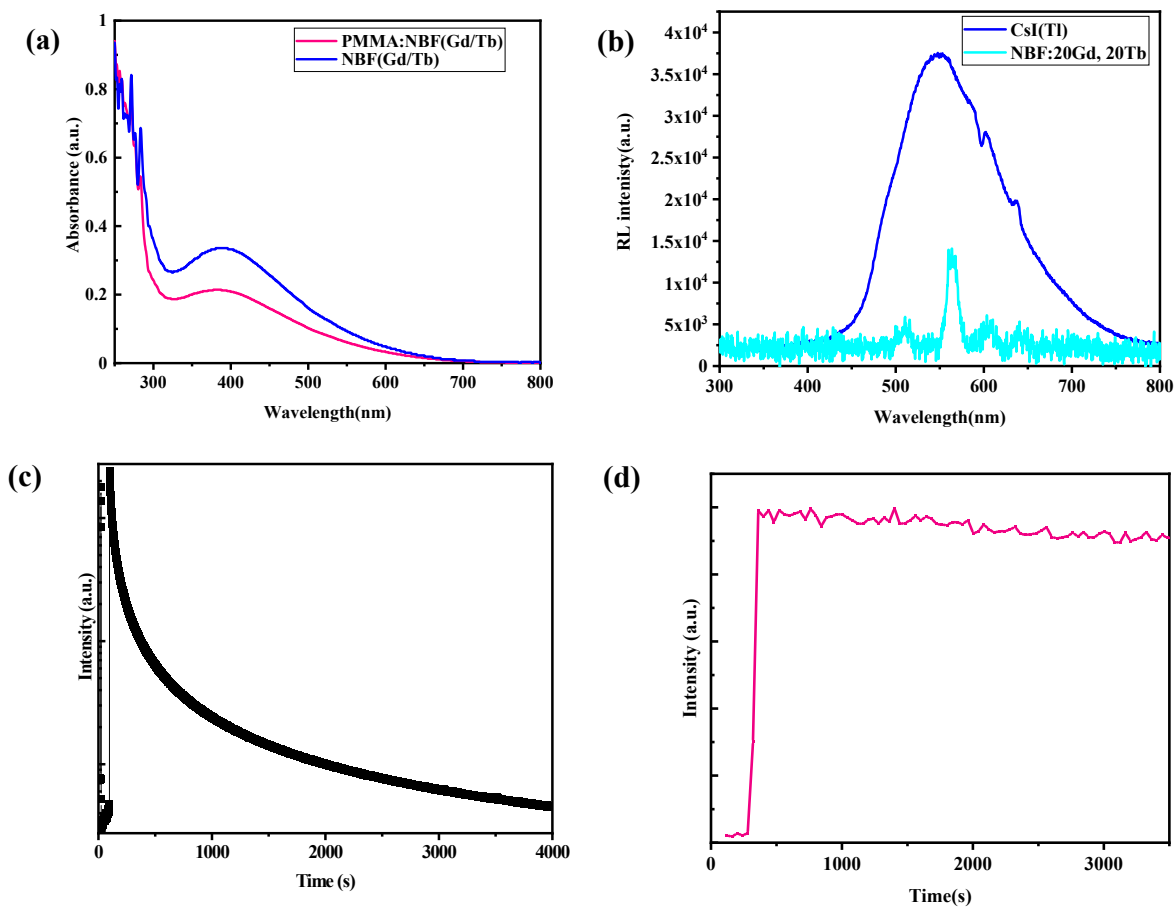

**Figure S8.** (a) Absorption spectra of PMMA-NBF film and NBF:20Gd, 20Tb (b) XEOL emission spectra of the NBF: 20Gd/20Tb NPs and the commercial CsI (Tl) single crystal, (c) Persistent luminescence decay curve of NBF: 20Gd/20Tb samples for 60 min after switching off X-ray (d) Radioluminescence stability of NBF: 20Gd/20Tb powder samples under continuous X-ray irradiation for 60 min.



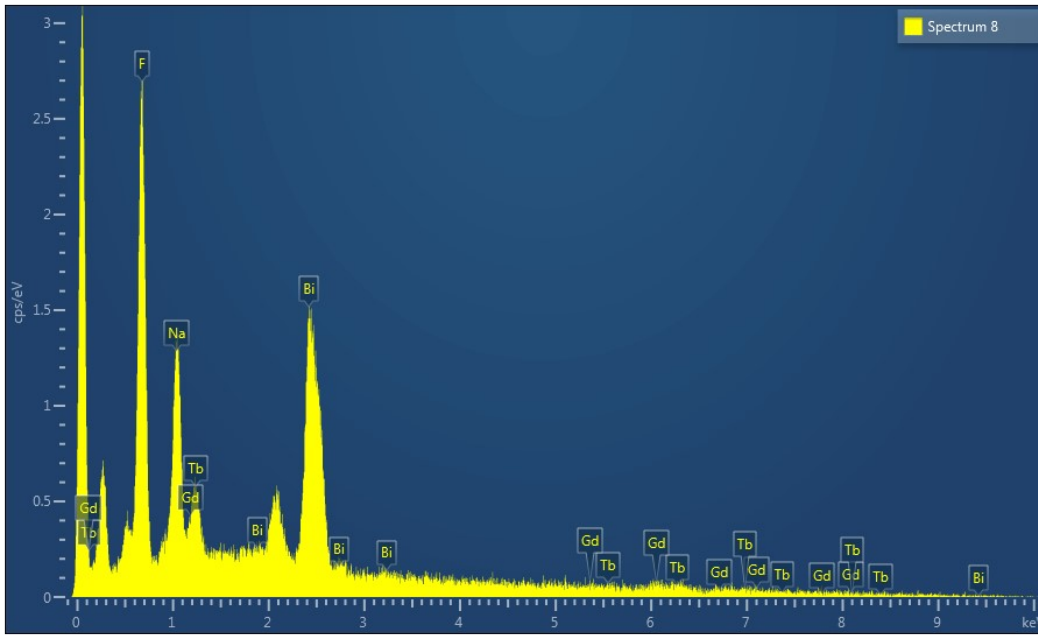

**Figure S9.** EDX spectrum of PMMA: NBF (Gd, Tb) composite films.

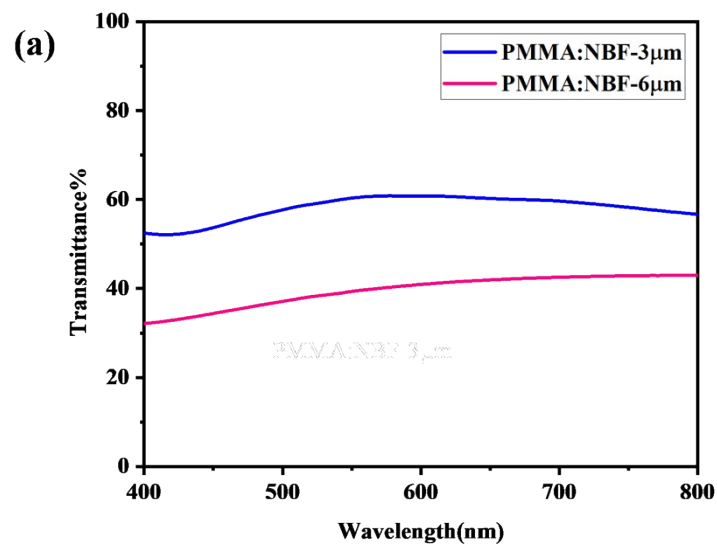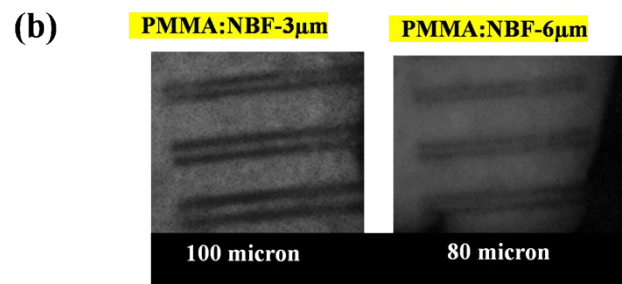

**Figure S10.** (a) Transmittance spectra of the prepared films with different thickness, 3 and 6  $\mu\text{m}$ . (b) XEOL images formed of a duplex wire with the utilization of the PMMA: NBF nanoscintillator films with different thickness, 3 and 6  $\mu\text{m}$ .

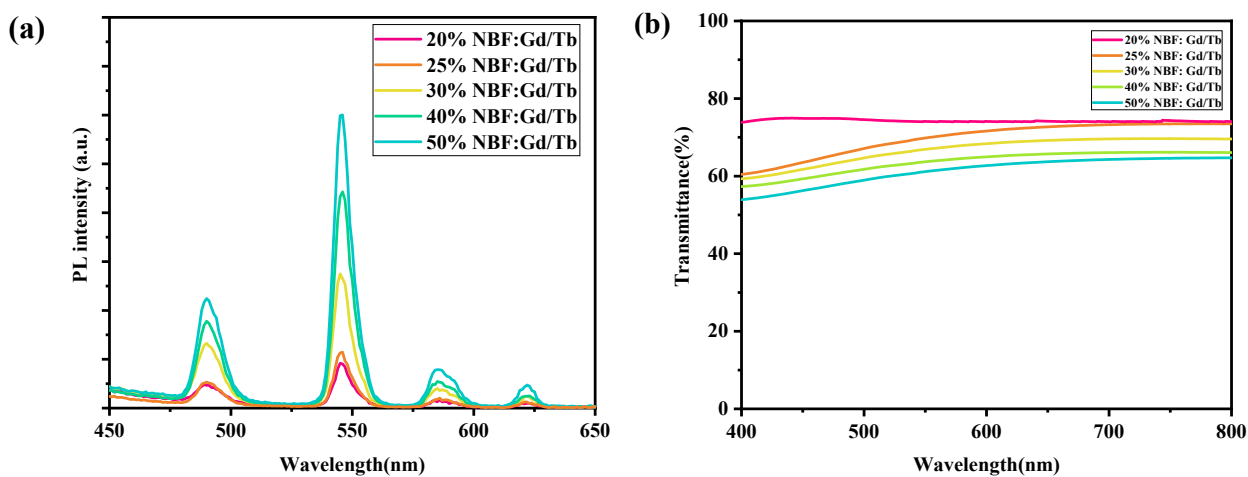

**Figure S11.** (a) PL spectra and (b) transmission spectra of PMMA-NBF film with different loading percentages.

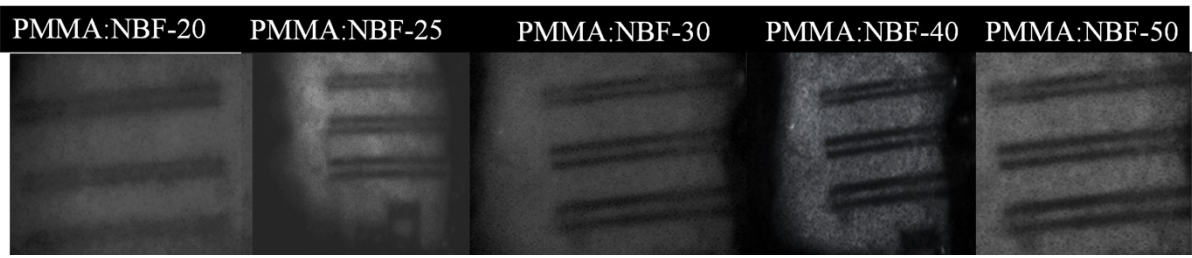

**Figure S12.** XEOL images of a duplex wire with the utilization of the PMMA: NBF composite films of loading 20%, 25%, 30%, 40% and 50%.
